# Supplementary material
Source: publisher figshare collection journal article supplement (https://acs.figshare.com/ndownloader/files/5667735)

# Selective Syntheses of Novel Polyether Fullerene Multiple Adducts

Zhiguo Zhou, David I. Schuster, and Stephen R. Wilson\*

*Department of Chemistry, New York University  
100 Washington Square East, New York, NY, 10003*

## (Supporting Information)

| Entries   | S.I. Contents                                                                                     | Page Numbers |
|-----------|---------------------------------------------------------------------------------------------------|--------------|
| <b>1</b>  | <sup>1</sup> H NMR and <sup>13</sup> C NMR of Compound <b>1</b>                                   | <b>S3</b>    |
| <b>2</b>  | Mass spectrum of compound <b>1</b>                                                                | <b>S4</b>    |
| <b>3</b>  | <sup>13</sup> C NMR of compound <b>2</b>                                                          | <b>S5</b>    |
| <b>4</b>  | <sup>13</sup> C NMR of compound <b>2</b> (expanded aromatic region)                               | <b>S6</b>    |
| <b>5</b>  | <sup>1</sup> H NMR and <sup>13</sup> C NMR of Compound <b>5</b>                                   | <b>S7</b>    |
| <b>6</b>  | Mass spectrum of compound <b>5</b>                                                                | <b>S8</b>    |
| <b>7</b>  | <sup>1</sup> H NMR and <sup>13</sup> C NMR of Compound <b>6</b>                                   | <b>S9</b>    |
| <b>8</b>  | <sup>1</sup> H NMR and <sup>13</sup> C NMR of Compound <b>8</b>                                   | <b>S10</b>   |
| <b>9</b>  | Mass spectrum of compound <b>8</b>                                                                | <b>S11</b>   |
| <b>10</b> | <sup>1</sup> H NMR and <sup>13</sup> C NMR of Compound <b>9</b>                                   | <b>S12</b>   |
| <b>11</b> | Mass spectrum of compound <b>9</b>                                                                | <b>S13</b>   |
| <b>12</b> | <sup>13</sup> C NMR (fullerene <i>sp</i> <sup>2</sup> region) of Compound <b>10</b>               | <b>S14</b>   |
| <b>13</b> | <sup>1</sup> H NMR and <sup>13</sup> C NMR ( <i>sp</i> <sup>2</sup> region) of Compound <b>11</b> | <b>S15</b>   |
| <b>14</b> | <sup>13</sup> C NMR (expanded fullerene <i>sp</i> <sup>2</sup> region) of Compound <b>11</b>      | <b>S16</b>   |
| <b>15</b> | Mass spectrum of compound <b>11</b>                                                               | <b>S17</b>   |
| <b>16</b> | Mass spectrum of compound <b>12</b>                                                               | <b>S18</b>   |
| <b>17</b> | UV-vis spectrum of C <sub>60</sub> <i>tris</i> -adduct <b>13</b>                                  | <b>S19</b>   |
| <b>18</b> | <sup>13</sup> C NMR (fullerene <i>sp</i> <sup>2</sup> region) of Compound <b>13</b>               | <b>S20</b>   |

**General Experimental Section:**  $^1\text{H}$  NMR spectra were taken on a 300MHz NMR spectrometer and  $^{13}\text{C}$  NMR spectra were taken on a 500 MHz NMR spectrometer. Mass spectra were taken using either ESI-MS or MALDI-TOF mass spectrometer. All the  $^3\text{He}@C_{60}$  multiple adducts were prepared using the same procedure as for their corresponding pristine  $C_{60}$  adducts, with  $^3\text{He}@C_{60}$  in place of pristine  $C_{60}$ .  $^3\text{He}$  NMR spectra were recorded at Yale University, using gaseous  $^3\text{He}$  as internal standard.

# $^1\text{H}$ NMR and $^{13}\text{C}$ NMR of Compound 1

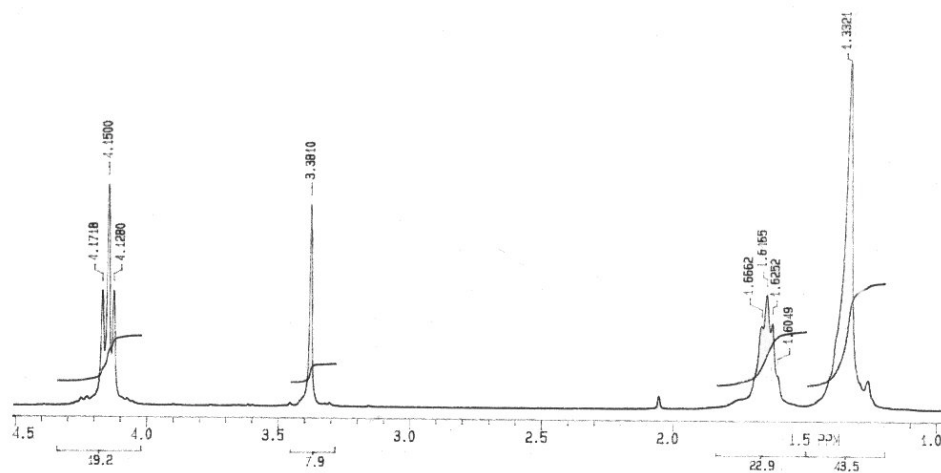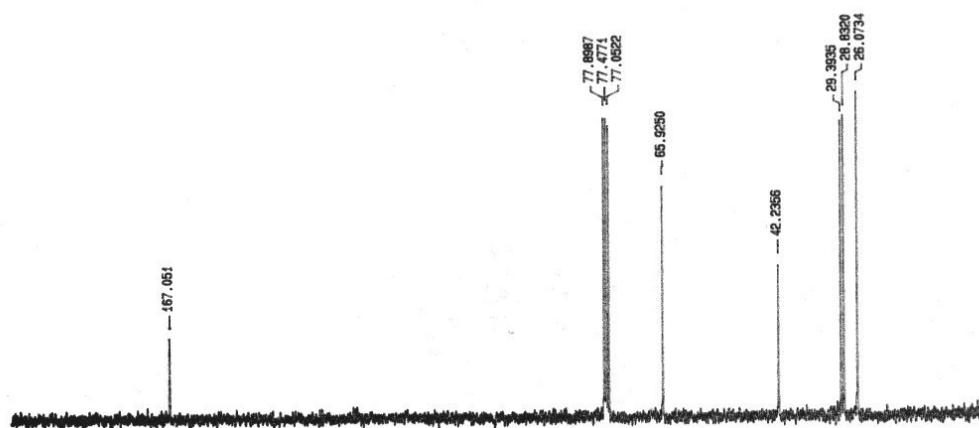

# Mass spectrum of compound 1

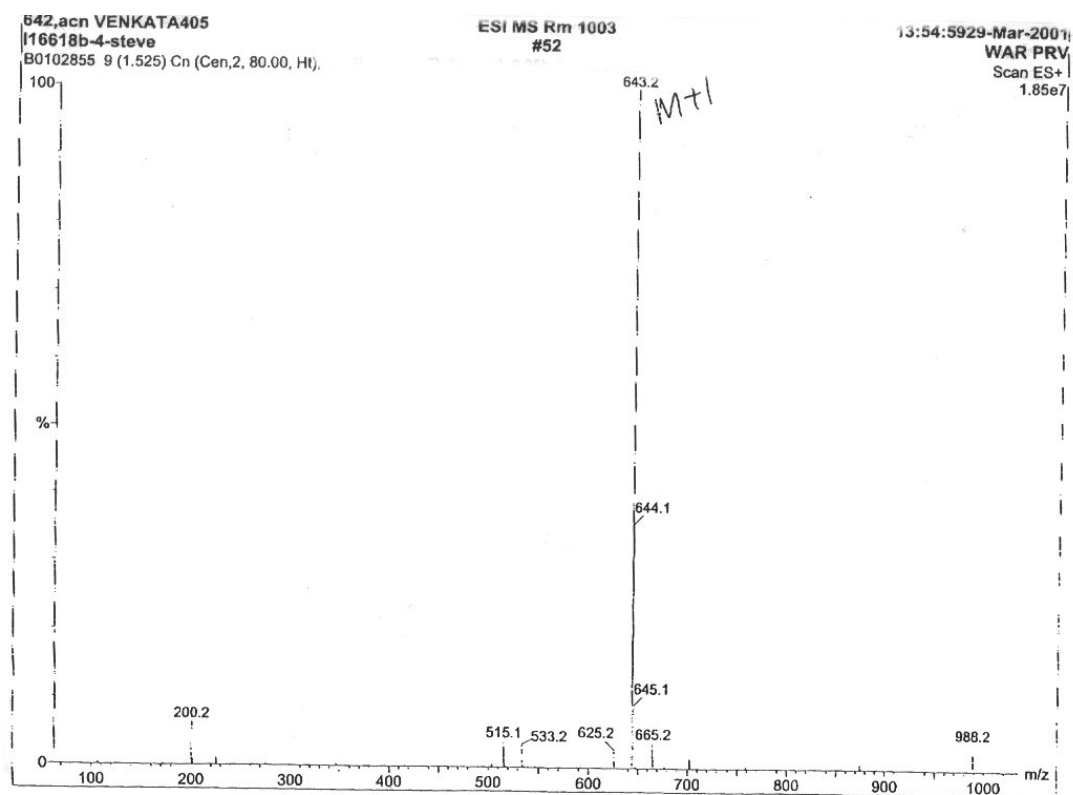

$^{13}\text{C}$  NMR of compound **2**

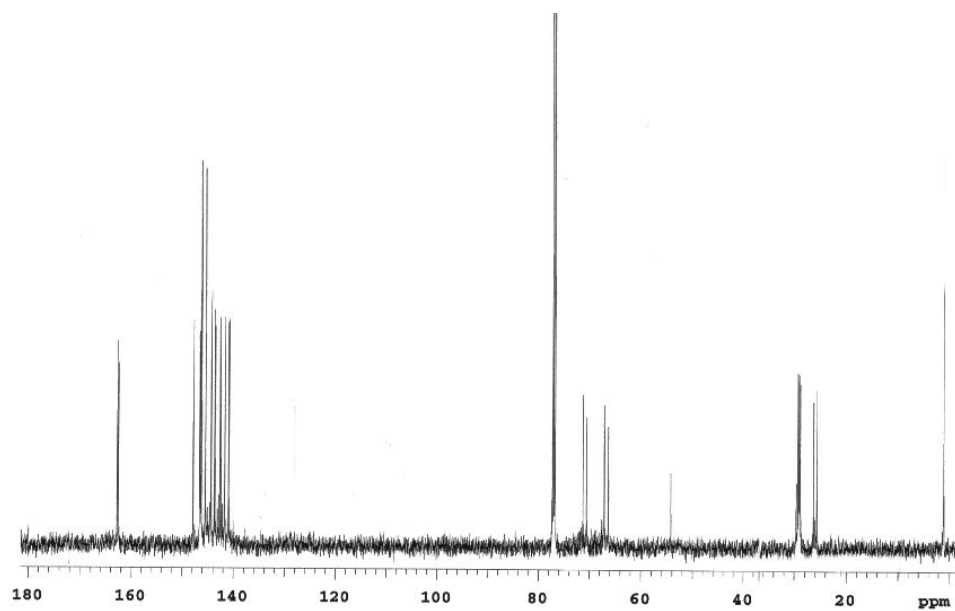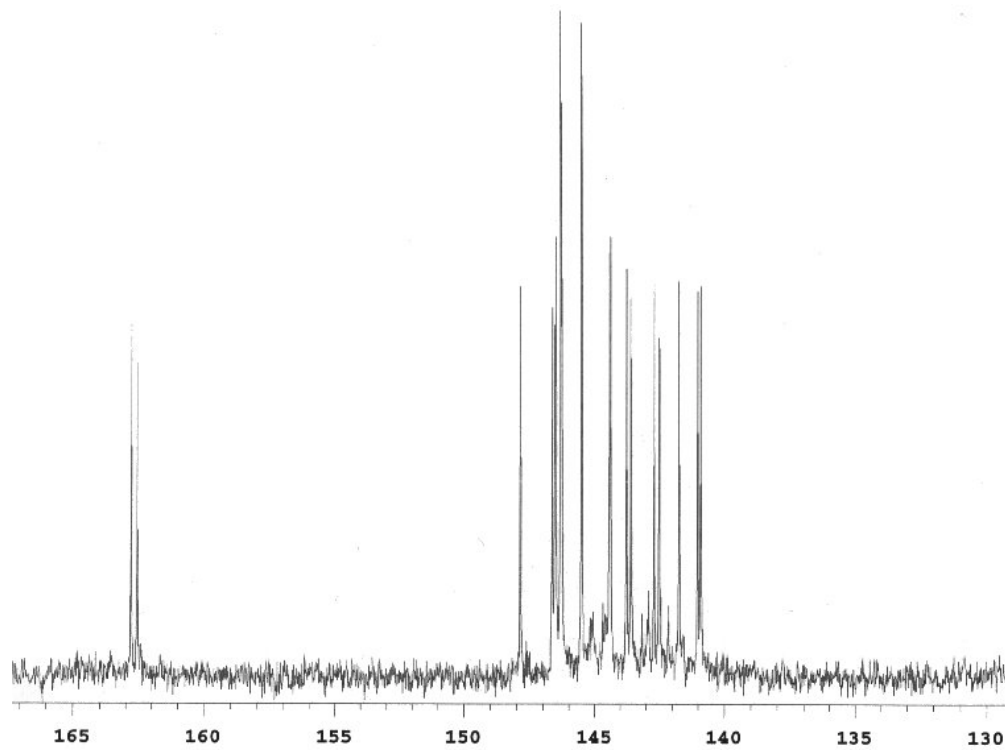

$^{13}\text{C}$  NMR of compound **2** (expanded aromatic region)

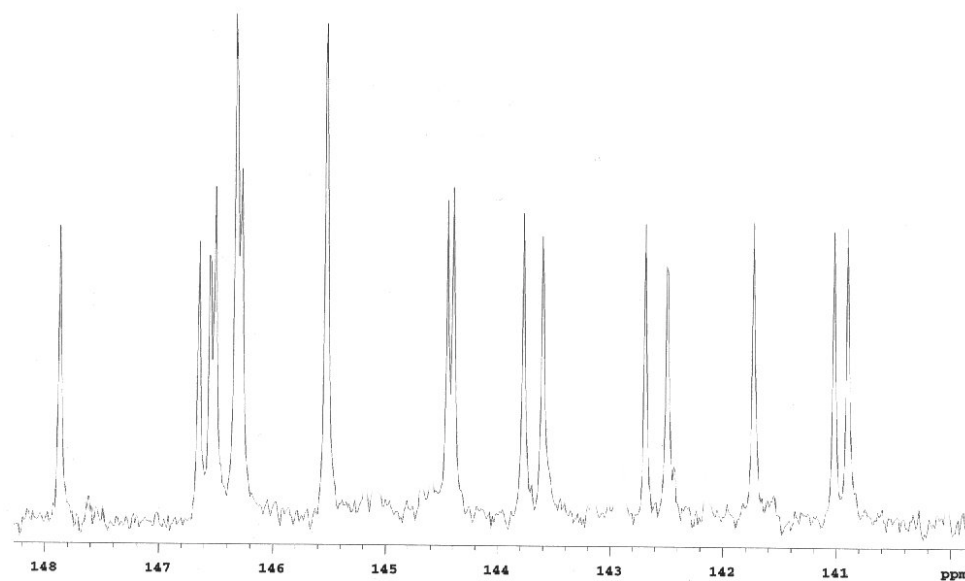

$^1\text{H}$  NMR and  $^{13}\text{C}$  NMR of Compound **5**

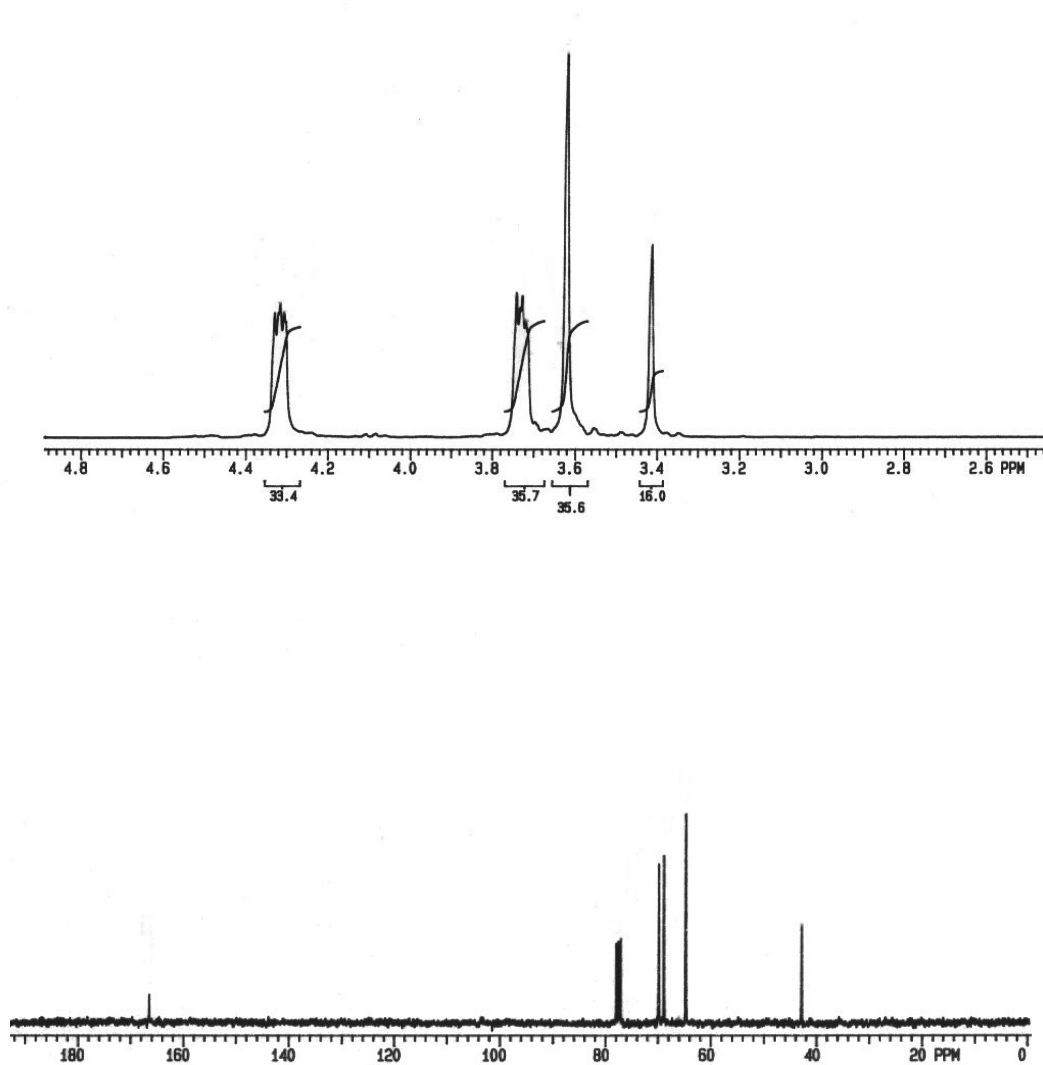

Mass spectrum of compound **5**  
(Complex peaks of **5** with the set of alkali metal ions:  
 $\text{Li}^+$ ,  $\text{Na}^+$ ,  $\text{K}^+$ ,  $\text{Rb}^+$  and  $\text{Cs}^+$ )

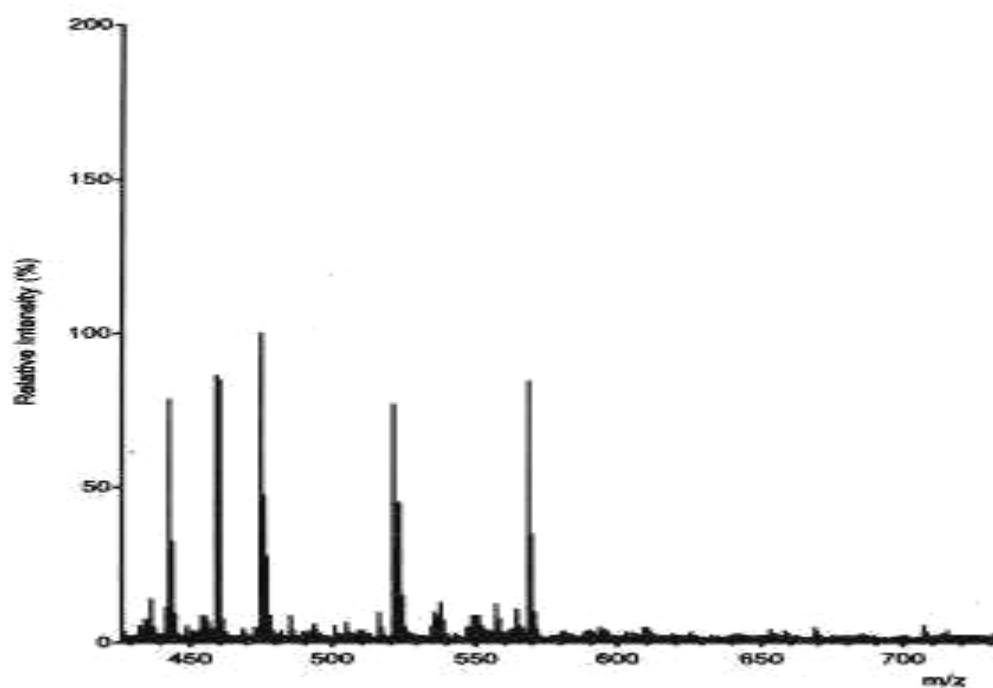



$^1\text{H}$  NMR and  $^{13}\text{C}$  NMR of Compound **6**

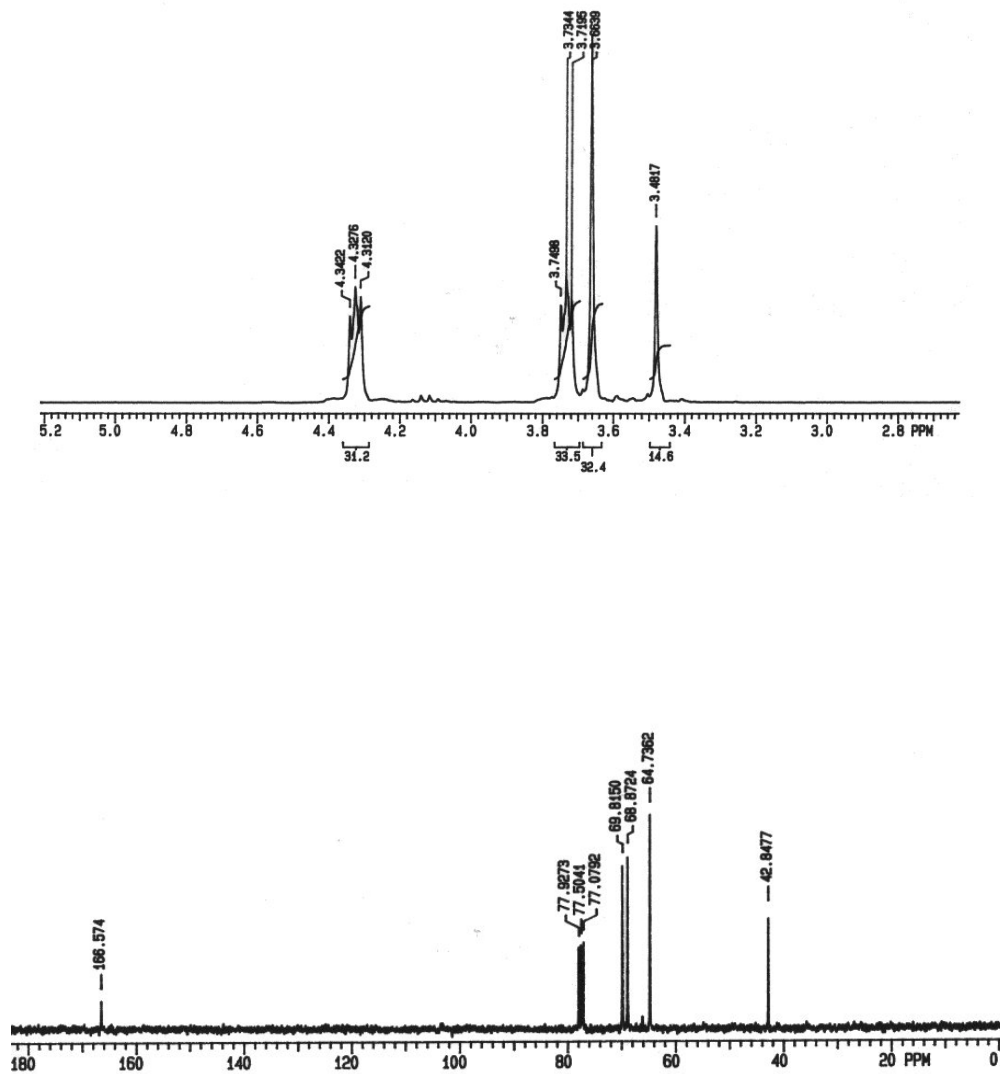

$^1\text{H}$  NMR and  $^{13}\text{C}$  NMR of Compound **8**

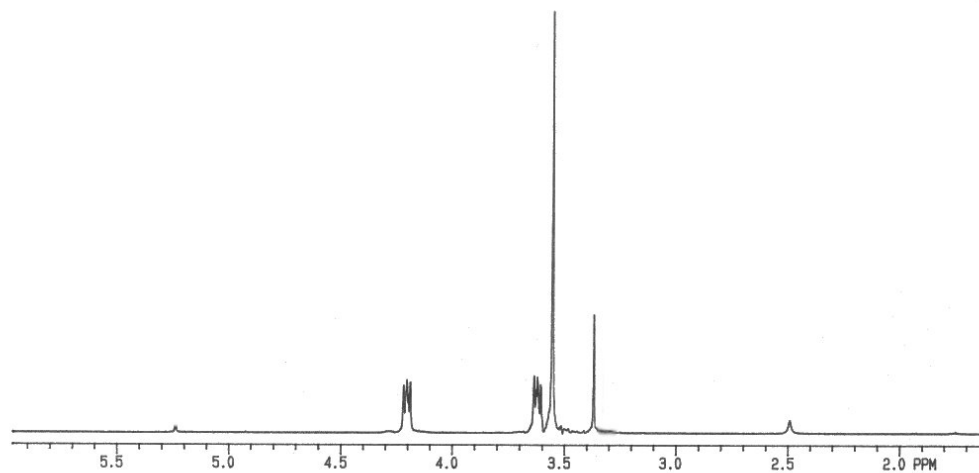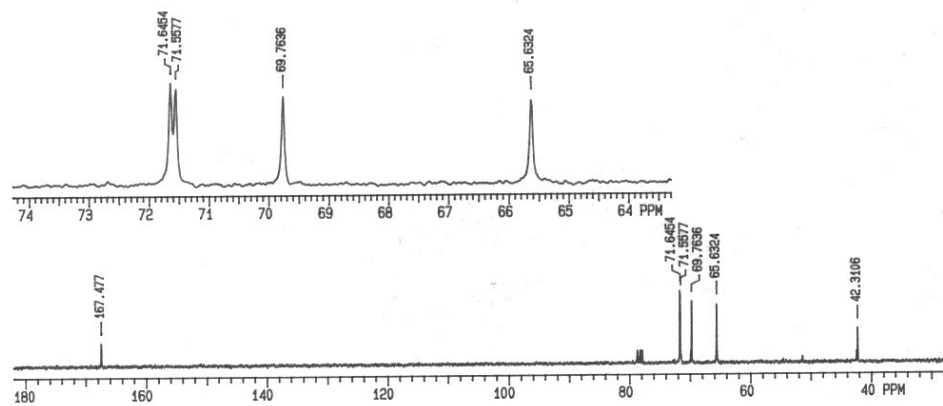

# Mass spectrum of compound 8

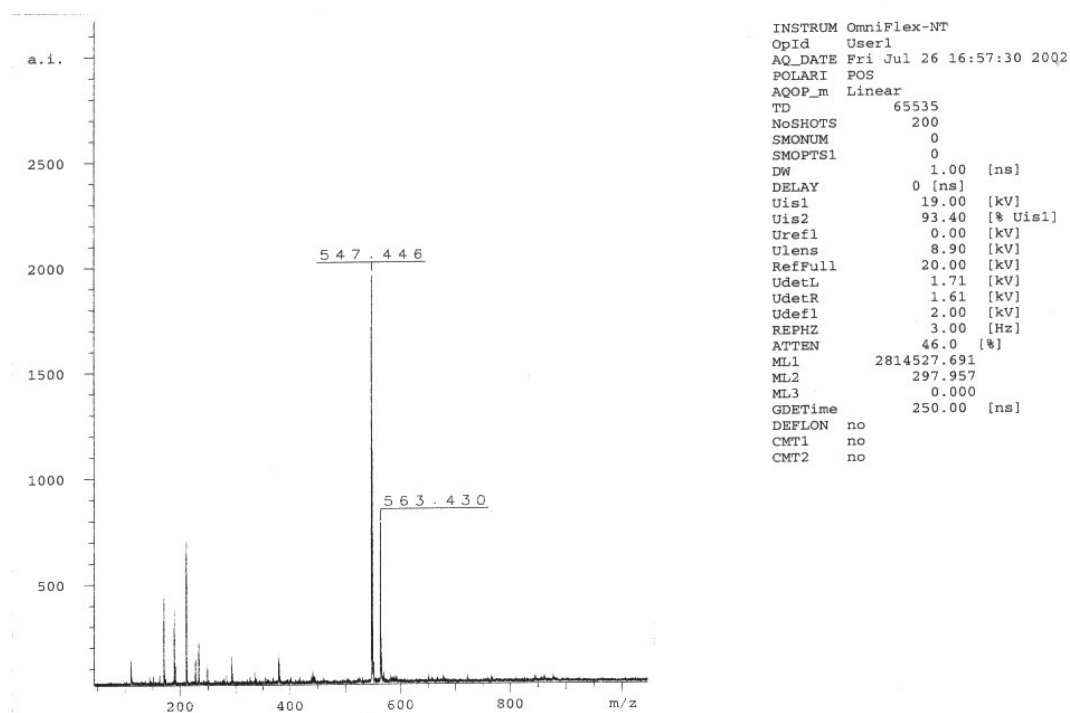

$^1\text{H}$  NMR and  $^{13}\text{C}$  NMR of Compound **9**

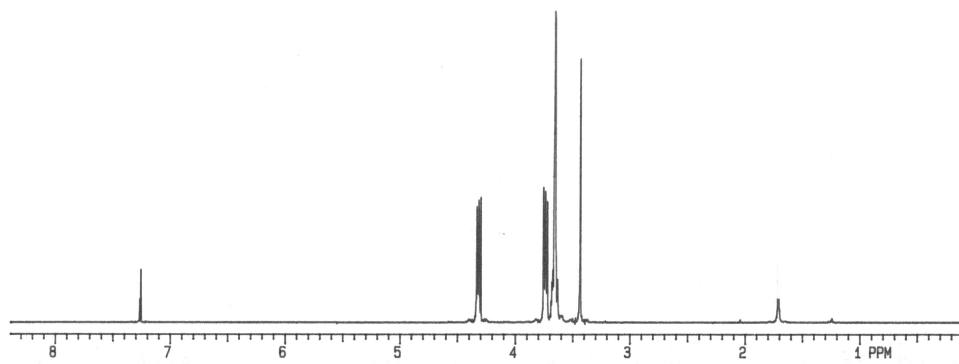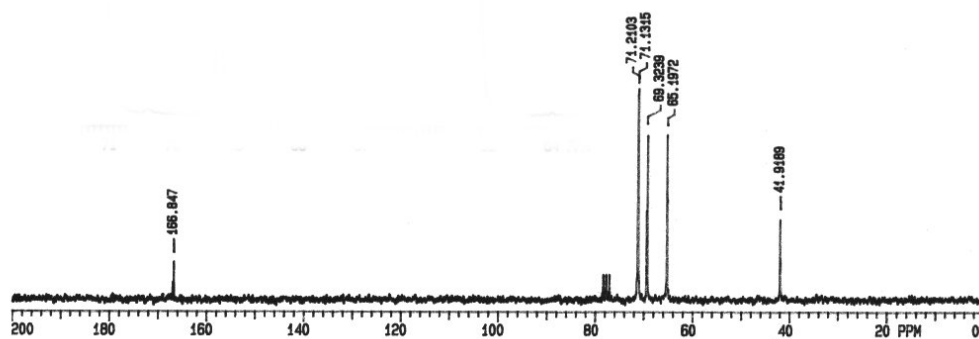

# Mass spectrum of compound 9

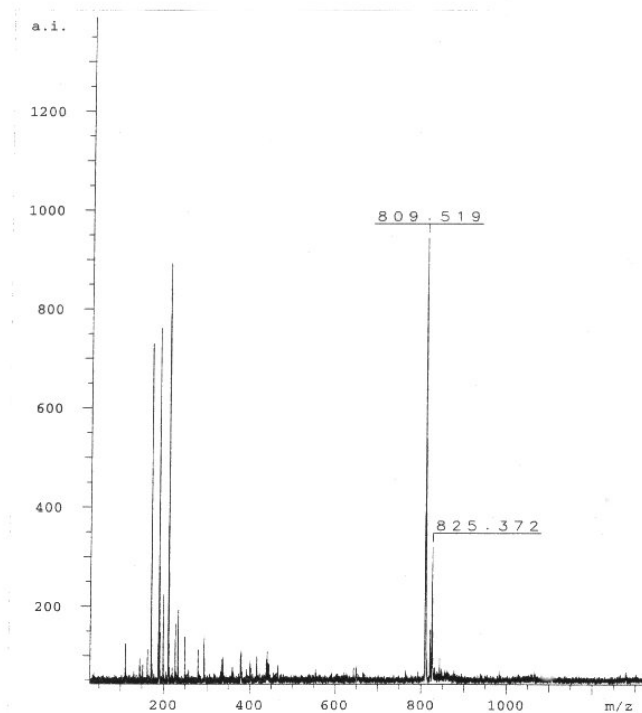

INSTRUM OmniFlex-NT  
OpId User1  
AQ\_DATE Fri Jul 26 16:59:08 2002  
POLARI POS  
AQOP\_m Linear  
TD 65535  
NoSHOTS 200  
SMONUM 0  
SMOPTS1 0  
DW 1.00 [ns]  
DELAY 0 [ns]  
Uis1 19.00 [kV]  
Uis2 93.40 [% Uis1]  
Uref1 0.00 [kV]  
Ulen 8.90 [kV]  
RefFull 20.00 [kV]  
UdetL 1.71 [kV]  
UdetR 1.61 [kV]  
Udefl 2.00 [kV]  
REPHZ 3.00 [Hz]  
ATTEN 46.0 [%]  
ML1 2814527.691  
ML2 297.957  
ML3 0.000  
GDETime 250.00 [ns]  
DEFLON no  
CMT1 no  
CMT2 no

$^{13}\text{C}$  NMR (fullerene  $sp^2$  region) of Compound **10**

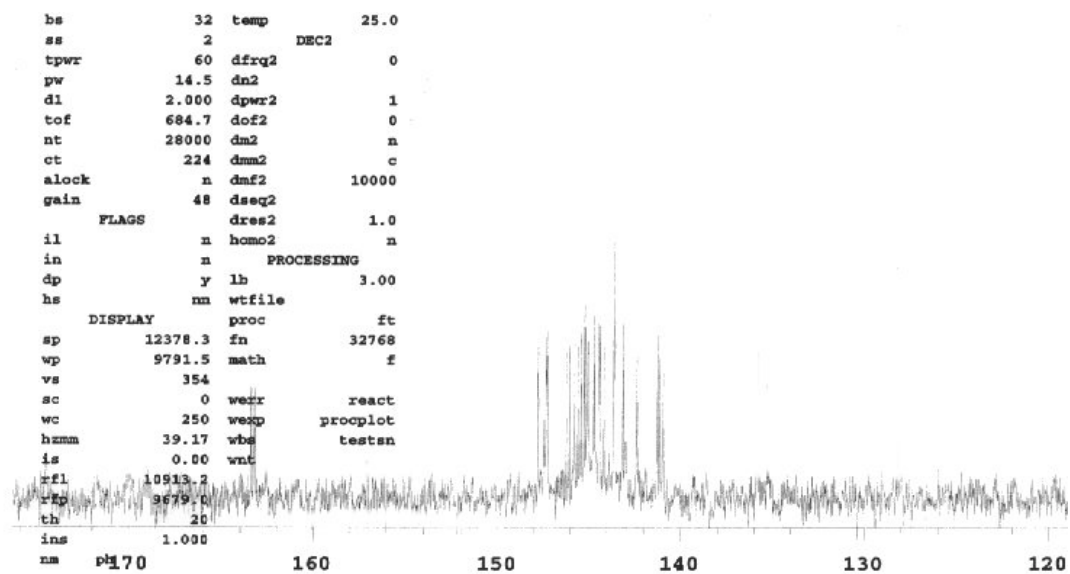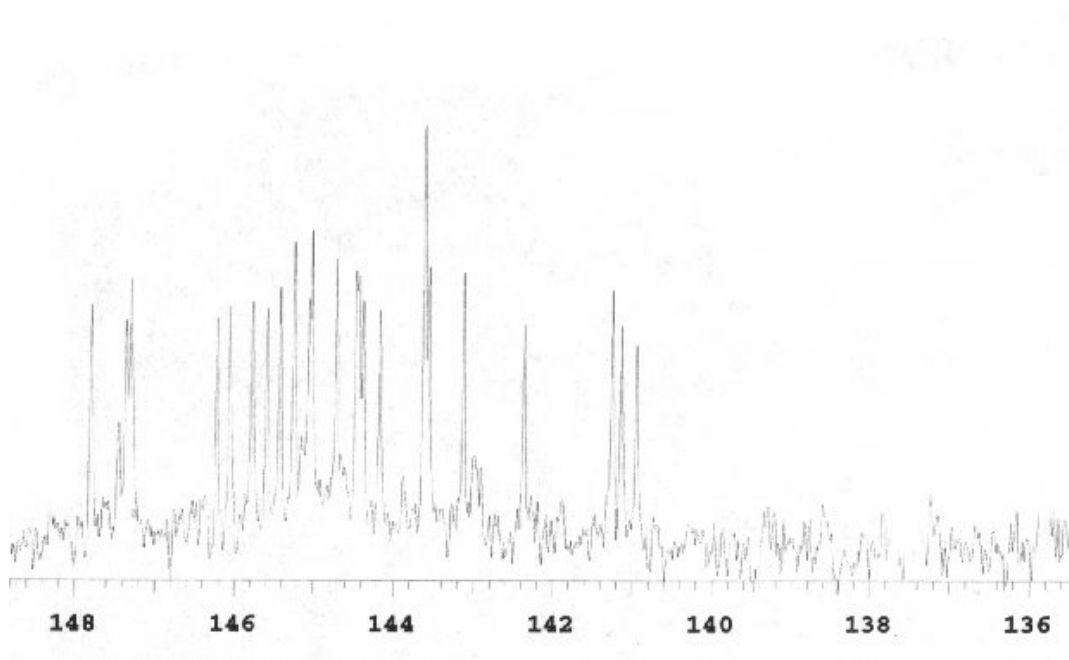

$^1\text{H}$  NMR and  $^{13}\text{C}$  NMR ( $sp^2$  region) of Compound **11**

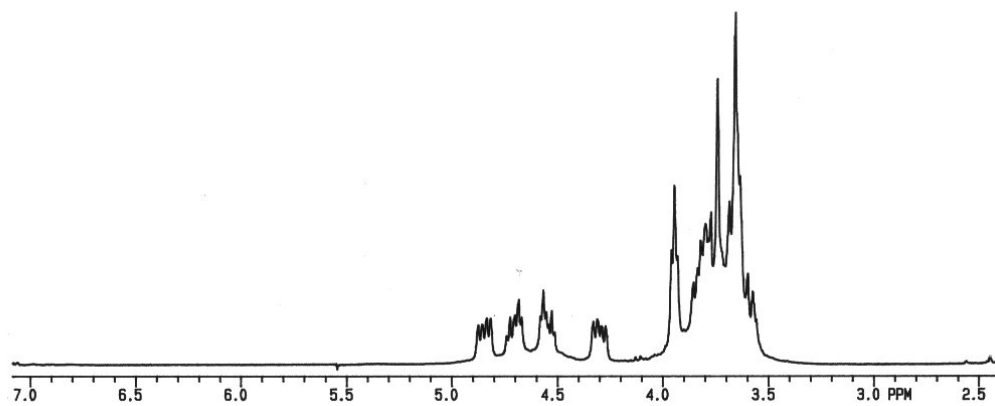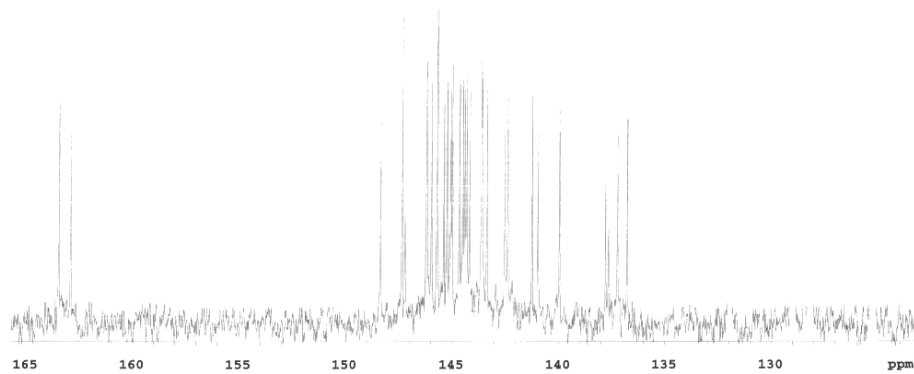

$^{13}\text{C}$  NMR (expanded fullerene  $sp^2$  region) of Compound **11**

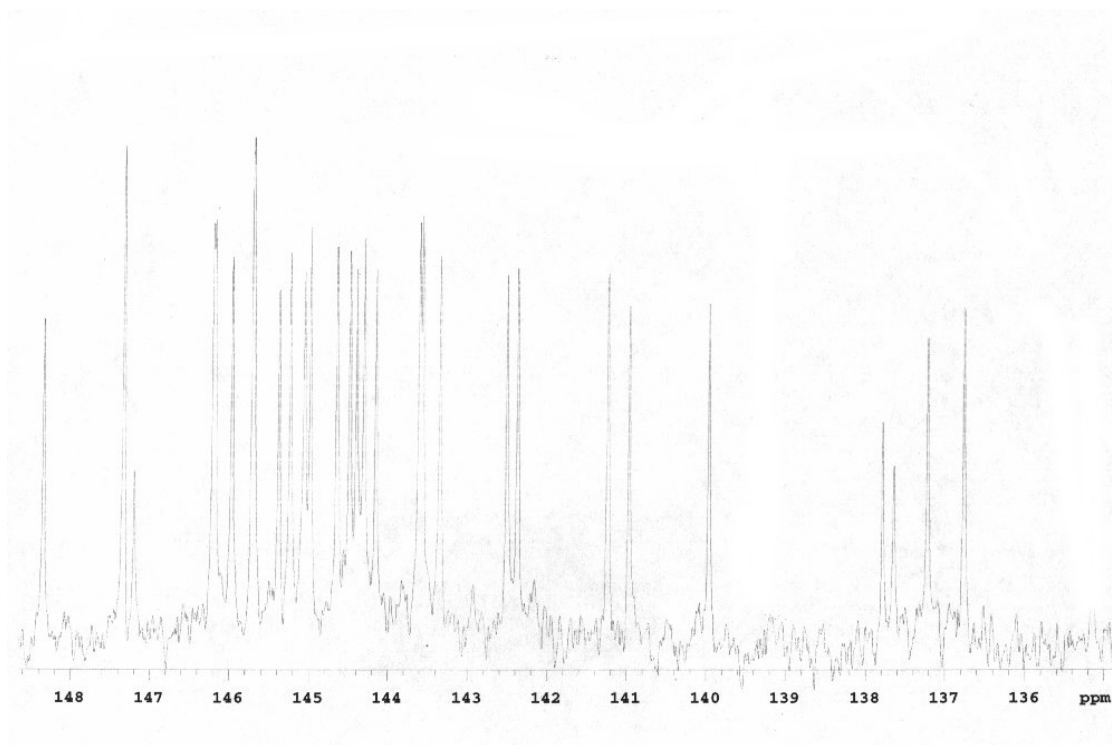



## Mass spectrum of compound **11**

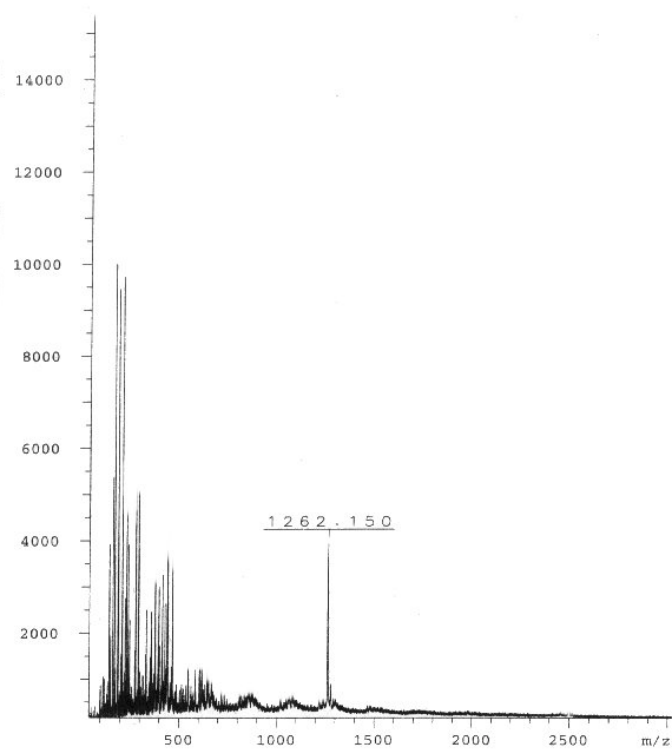

```
INSTRUM OmniFlex-NT
OpId      User1
AQ_DATE   Tue Aug 06 16:43:21 2002
POLARI    PCS
AQOP_m    Linear
TD         65535
NoSHOTS   205
SMONUM     0
SMOPTS1    0
DW         1.00 [ns]
DELAY      0 [ns]
Uis1       19.00 [kV]
Uis2       93.40 [% Uis1]
Uref1      0.00 [kV]
Ulen1      8.90 [kV]
RefFull    20.00 [kV]
UdetL      1.71 [kV]
UdetR      1.61 [kV]
Udef1      2.00 [kV]
REPHZ      3.00 [Hz]
ATTEN      40.0 [%]
ML1        2802430.288
ML2        275.064
ML3         0.000
GDETime    250.00 [ns]
DEFLON     no
CMT1       no
CMT2       no
```

## Mass spectrum of compound 12

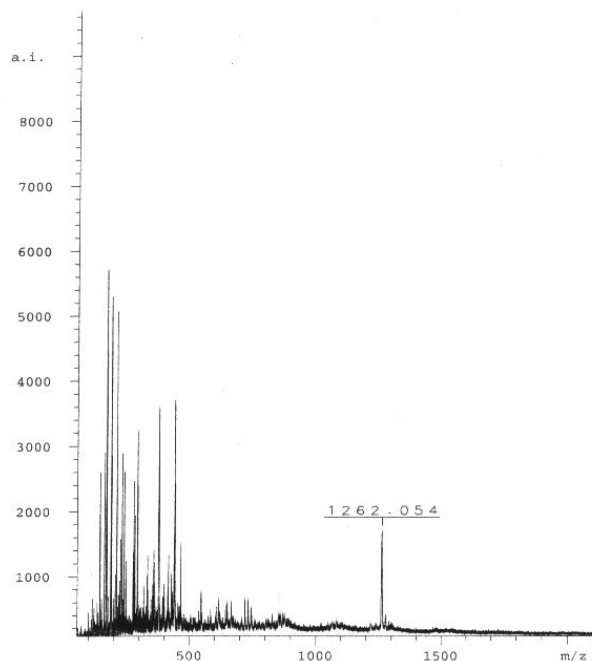

```
INSTRUM OmniFlex-NT
OpId User1
AQ_DATE Tue Aug 06 16:44:20 2002
POLARI POS
AQOP_m Linear
TD 65535
NoSHOTS 205
SMONUM 0
SMOPTS1 0
DW 1.00 [ns]
DELAY 0 [ns]
Uisl 19.00 [kV]
Uis2 93.40 [% Uisl]
Urefl 0.00 [kV]
Ulens 8.90 [kV]
RefFull 20.00 [kV]
UdetL 1.71 [kV]
UdetR 1.61 [kV]
Udefl 2.00 [kV]
REPHZ 3.00 [Hz]
ATTEN 40.0 [%]
ML1 2802430.288
ML2 275.064
ML3 0.000
GDETime 250.00 [ns]
DEFLON no
CMT1 no
CMT2 no
```

## UV-vis spectrum of C<sub>60</sub> *tris*-adduct **13**

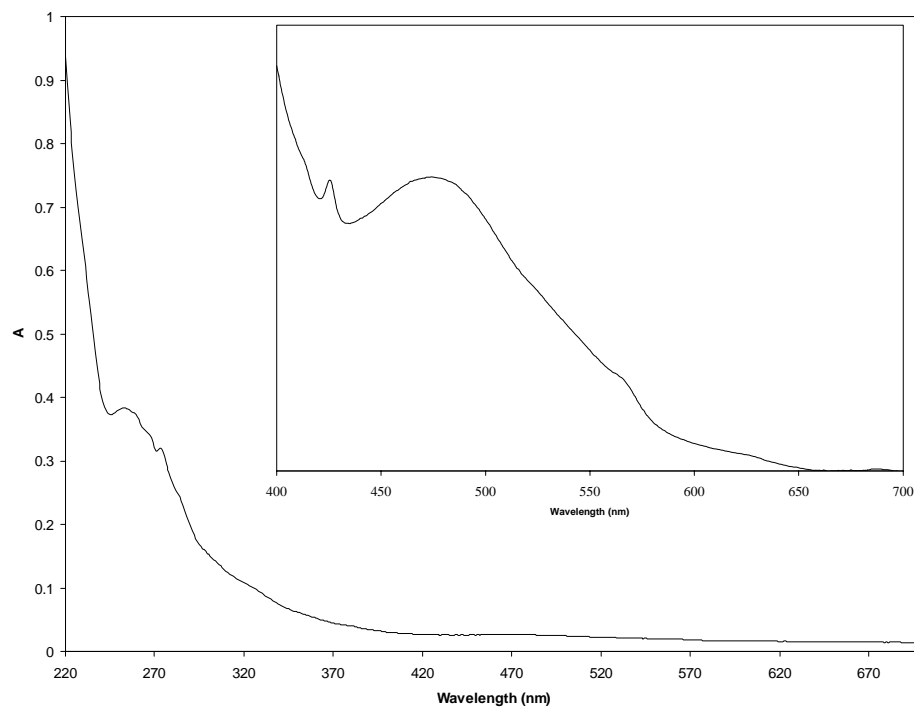

$^{13}\text{C}$  NMR (fullerene  $sp^2$  region) of Compound **13**

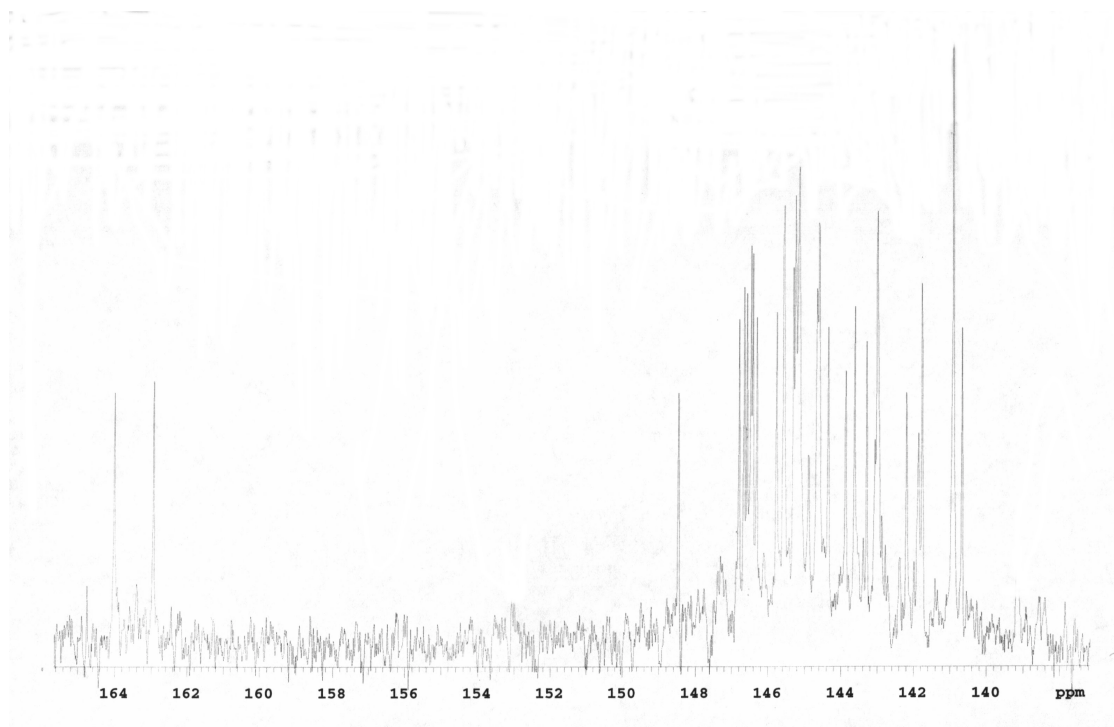

Supplement: Supplementary file 1 [file 5667735]
